# Supplementary material for: Ultra-small palladium nano-particles synthesized using bulky S/Se and N donor ligands as a stabilizer: application as catalysts for Suzuki–Miyaura coupling
Source: Royal Society of Chemistry journal article supplement (doi:10.1039/c9ra03498f), 2019-01-01
Supplement: c9ra03498f1.pdf [file c9ra03498f1.pdf]

**ESI**

**For**

**Ultra-small Palladium Nano-particles Synthesized Using Bulky S/Se and N Donor Ligands  
as a Stabilizer: Application as Catalysts for Suzuki-Miyaura Coupling**

Preeti Oswal<sup>1</sup>, Aayushi Arora<sup>1</sup>, Jolly Kaushal<sup>1</sup>, Gyandshwar Kumar Rao<sup>2</sup>, Sushil Kumar<sup>1</sup>, Ajai K  
Singh<sup>3</sup>, Arun Kumar<sup>1\*</sup>

<sup>1</sup>*Department of Chemistry, School of Physical Sciences, Doon University, Dehradun, India*

<sup>2</sup>*Amity School of Applied Sciences, Amity University, Gurgaon, Haryana, India*

<sup>3</sup>*Department Of Chemistry, Indian Institue of Technology, Delhi, New Delhi*

*Corresponding author: Arun Kumar, e-mail: [arunkaushik@gmail.com](mailto:arunkaushik@gmail.com),*

*[akumar.ch@doonuniversity.ac.in](mailto:akumar.ch@doonuniversity.ac.in)*

**CONTENTS**

**S1. Syntheses of ligands L1' and L2'**

**Table S1. Crystal data and structural refinements for ligand L1.**

**Fig. S1.** <sup>1</sup>H NMR of ligand L1'

**Fig. S2.** <sup>13</sup>C {<sup>1</sup>H} NMR of ligand L1'

**Fig. S3.** <sup>1</sup>H NMR of ligand L2'

**Fig. S4.** <sup>13</sup>C {<sup>1</sup>H} NMR of ligand L2'

**Fig. S5.** <sup>1</sup>H NMR of ligand L1

**Fig. S6.** <sup>13</sup>C {<sup>1</sup>H} NMR of ligand L1

**Fig. S7.** <sup>1</sup>H NMR of ligand L2

**Fig. S8.** <sup>13</sup>C {<sup>1</sup>H} NMR of ligand L2

**Fig. S9.** SEM–EDX analysis of NP's 1

**Fig. S10.** SEM–EDX analysis of NP's 2

**Fig. S11.** SEM–EDX analysis of NP's **3**

**Fig. S12.** SEM–EDX analysis of NP's **4**

**Fig. S13.** SEM–EDX analysis of NP's **6**

**Fig. S14.** PXRD analysis of ligand **L1**

**Fig. S15.** PXRD analysis of ligand **L2**

**S2. NMR Data of Coupled Products of Suzuki reaction**

**S3. References**

## S1. Syntheses of ligands L1' and L2'

**Synthesis of L1' and L2':** 9-Anthracenecarboxaldehyde (0.412 g, 2.0 mmol) was stirred in dry ethanol (5 mL) for 10 minutes at room temperature. The solution of 2-(phenylthio)ethylamine (0.306 g, 2.0 mmol) / 2-(phenylseleno)ethylamine (0.398 g, 2.0 mmol) was added drop wise with stirring. The mixture was further stirred for 8 h at room temperature. After completion of the reaction, the solvent was removed with a rotary evaporator resulting **L1'/L2'** as a yellow solid.

**L1':** Yield: Yellow solid (0.30 g) 86%. <sup>1</sup>H NMR (500 MHz, CDCl<sub>3</sub>, 25 °C, TMS): δ(ppm): 3.62 (t, 2H, SCH<sub>2</sub>), 4.36 (t, 2H, NCH<sub>2</sub>), 7.20 (m, 1H, Ar-H), 7.35-7.40 (m, 2H, Ar-H), 7.48-7.60 (m, 6H, Ar-H), 8.03 (m, 2H, Ar-H), 8.49-8.60 (m, 3H, Ar-H), 9.40 (s, 1H, CH=N). <sup>13</sup>C{<sup>1</sup>H}NMR (125 MHz, CDCl<sub>3</sub>, 25 °C, TMS): 34.5 (SCH<sub>2</sub>), 61.3 (NCH<sub>2</sub>), 124.6, 124.8, 125.2, 126.7, 128, 128.5, 129, 129.5, 131.1, 135.8 (Ar-C), 162.1 (N=C).

**L2':** <sup>1</sup>H NMR (500 MHz, CDCl<sub>3</sub>, 25 °C, TMS): δ(ppm): 3.43 (t, 2H, SeCH<sub>2</sub>), 4.18 (t, 2H, C-CH<sub>2</sub>-N), 7.21-7.28 (m, 3H, Ar-H), 7.43-7.51 (m, 4H, Ar-H), 7.59 (m, 2H, Ar-H), 7.9 (m, 2H, Ar-H), 8.4-8.51 (m, 3H, Ar-H), 9.31 (s, 1H, CH=N). <sup>13</sup>C{<sup>1</sup>H}NMR (125 MHz, CDCl<sub>3</sub>, 25 °C, TMS): 28.5 (SeCH<sub>2</sub>), 62.2 (NCH<sub>2</sub>), 124.7, 125.18, 126.2, 126.9, 127.8, 128.7, 129.1, 129.4, 129.7, 129.8, 131.1, 131.7 (Ar-C), 161.7 (N=C).

**TABLE S1. Crystal data and structural refinements for ligand L1**

|                                                       | <b>L1</b>                                                                                                                          |
|-------------------------------------------------------|------------------------------------------------------------------------------------------------------------------------------------|
| Empirical formula                                     | C <sub>23</sub> H <sub>21</sub> NS                                                                                                 |
| Formula weight                                        | 343.47                                                                                                                             |
| Temperature                                           | 150.01(10) K                                                                                                                       |
| Wavelength                                            | 1.541                                                                                                                              |
| Crystal system, space group                           | Triclinic, <i>P</i> -1                                                                                                             |
| Unit cell dimension                                   | a = 5.3825(7) Å<br>b = 15.3166(13) Å<br>c = 21.472(3) Å<br>$\alpha$ = 89.910(8)°<br>$\beta$ = 84.752(10)°<br>$\gamma$ = 89.905(9)° |
| <i>V</i>                                              | 1762.8 (4) Å <sup>3</sup>                                                                                                          |
| <i>Z</i>                                              | 4                                                                                                                                  |
| Absorption coefficient                                | 1.639                                                                                                                              |
| F(000)                                                | 728                                                                                                                                |
| Crystal color                                         | Light yellow                                                                                                                       |
| Theta range for data collection                       | 3.5470 to 67.0830 deg.                                                                                                             |
| Density                                               | 1.294                                                                                                                              |
| Limiting indices                                      | -6<h<4, -15<h<18, -24<h<25                                                                                                         |
| Goodness –of –fit on F <sup>2</sup>                   | 1.131                                                                                                                              |
| <i>R</i> 1 <sup>b</sup> [ <i>I</i> > 2σ( <i>I</i> )]  | 0.0821                                                                                                                             |
| <i>R</i> 1 [all data]                                 | 0.1042                                                                                                                             |
| <i>wR</i> 2 <sup>c</sup> [ <i>I</i> > 2σ( <i>I</i> )] | 0.2427                                                                                                                             |
| <i>wR</i> 2 [all data]                                | 0.2912                                                                                                                             |
| CCDC                                                  | 1887878                                                                                                                            |

**Table S2. Selected bond distances and bond angles of L1**

| Bond Length(Å) |          | Bond Angles(°)   |          |
|----------------|----------|------------------|----------|
| S(2)–C(27)     | 1.765(6) | C(27)–S(2)–C(13) | 104.5(3) |
| S(2)–C(13)     | 1.826(6) | C(45)–N(3)–C(33) | 113.9(4) |
| N(3)–C(45)     | 1.436(8) |                  |          |
| N(3)–C(33)     | 1.492(7) |                  |          |

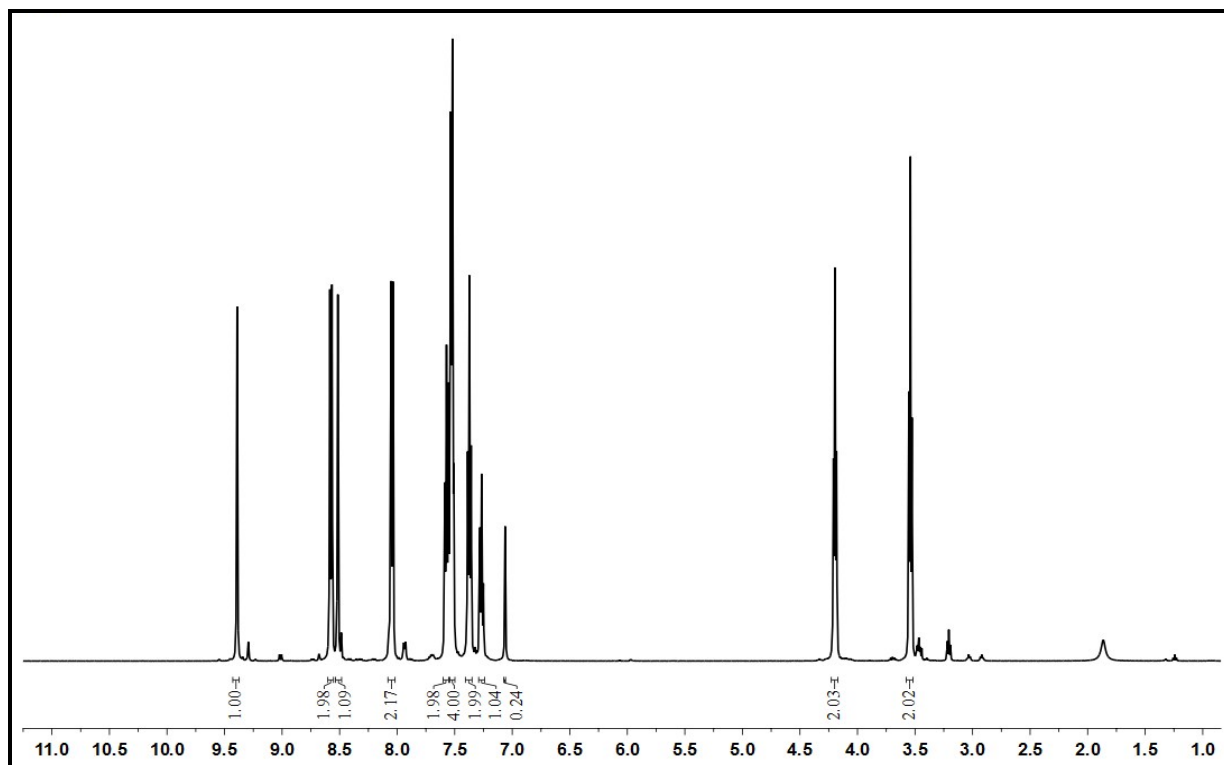

**Fig. S1.**  $^1\text{H}$  NMR of ligand L1'

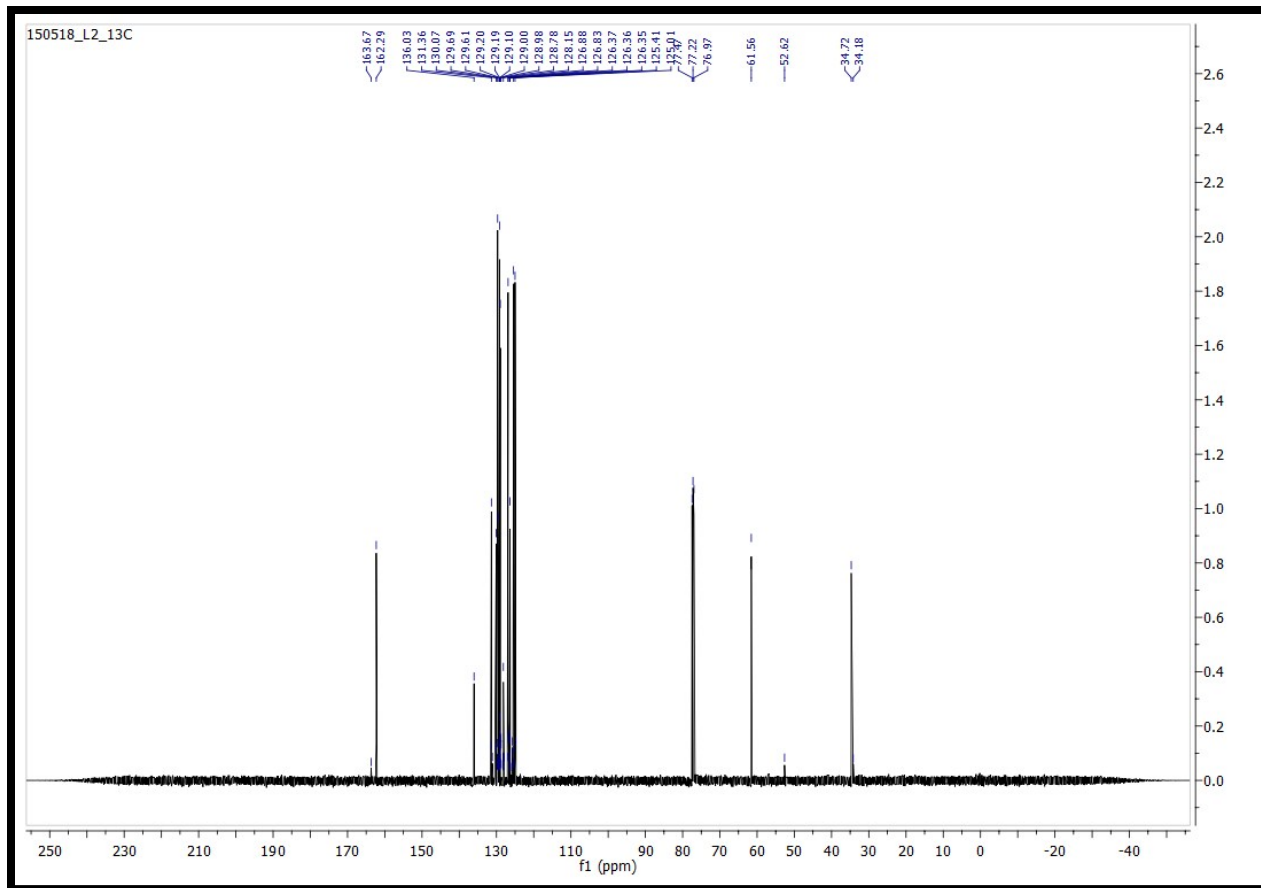

**Fig. S2.**  $^{13}\text{C}\{^1\text{H}\}$  NMR of ligand **L1'**

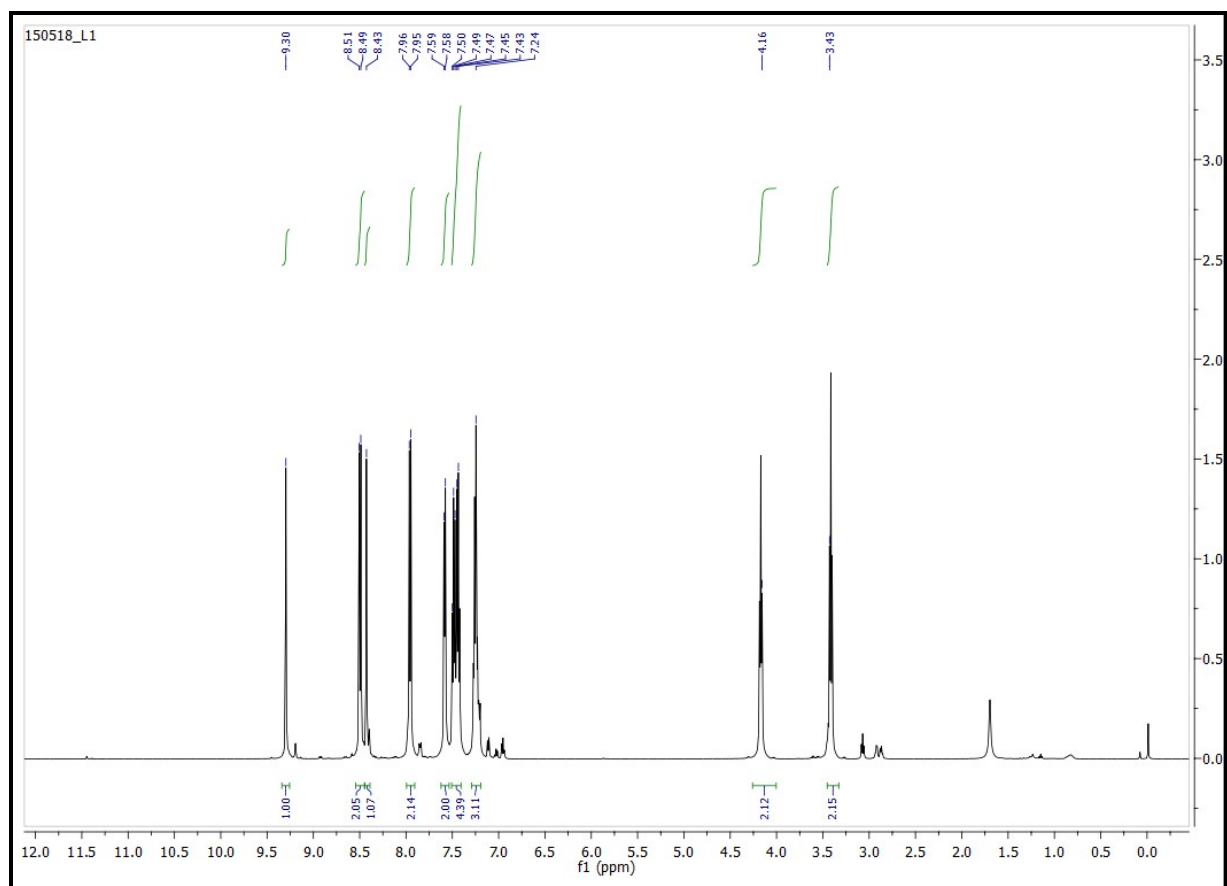

Fig. S3.  $^1\text{H}$  NMR of ligand L2'

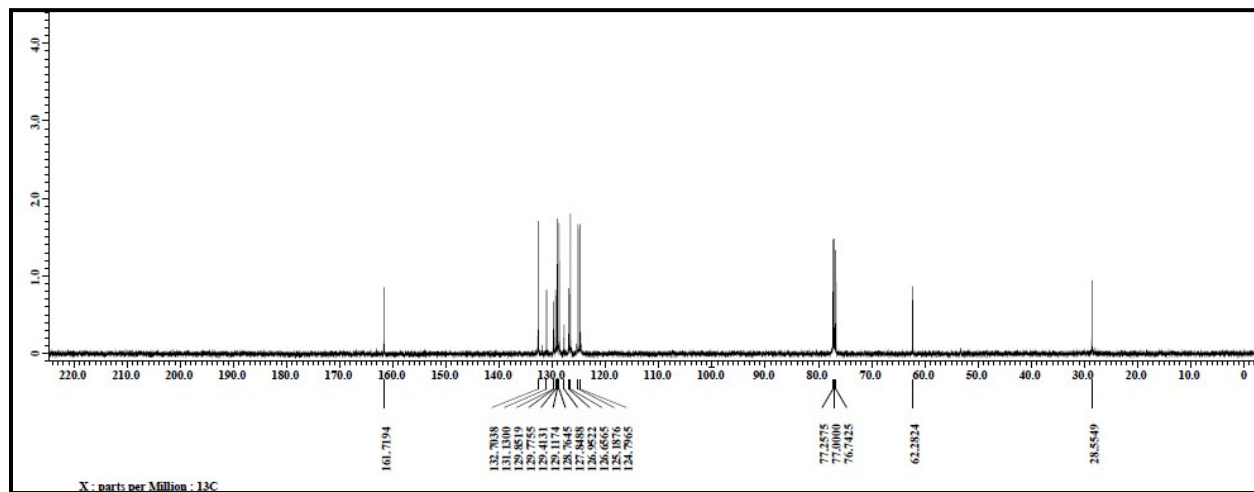

Fig. S4.  $^{13}\text{C}$  NMR of ligand L2'

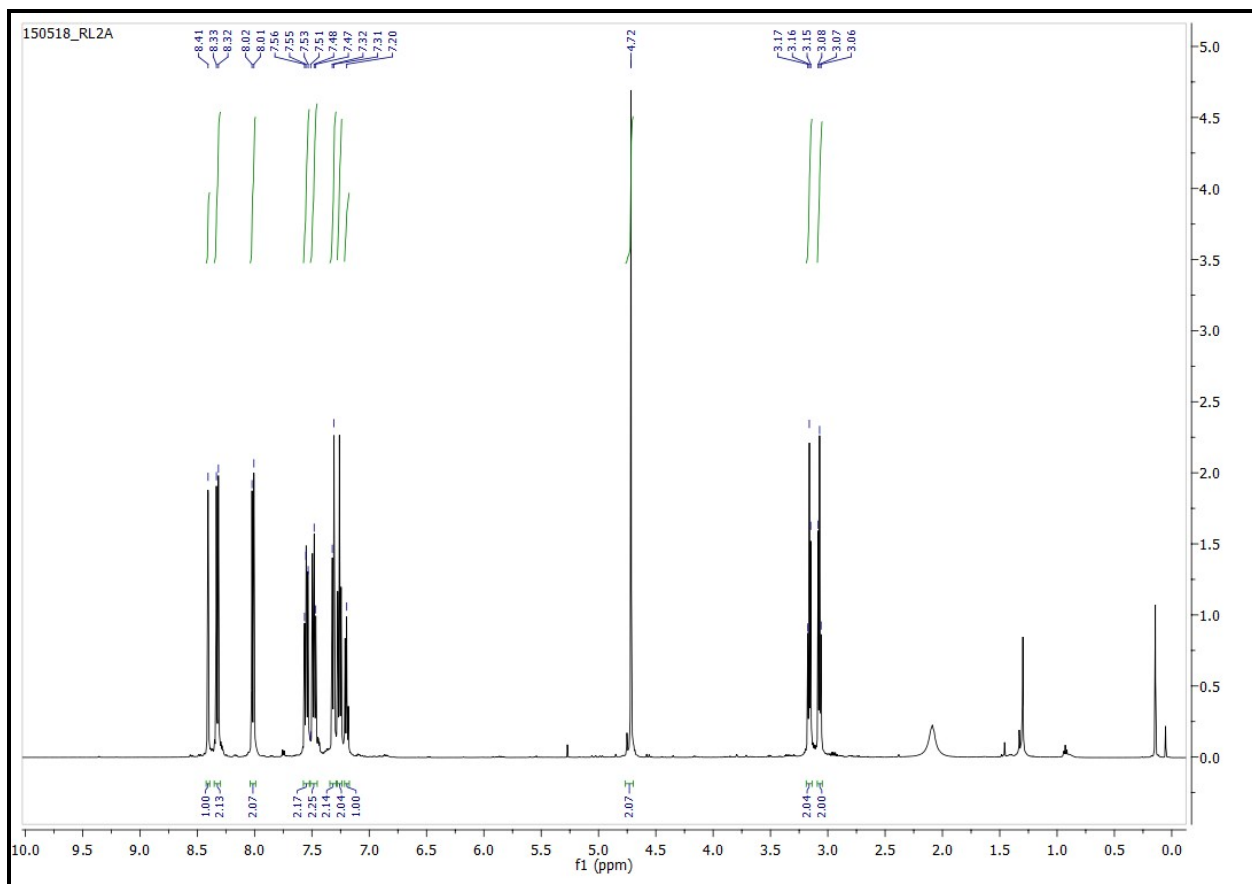

Fig. S5. <sup>1</sup>H NMR of ligand L1



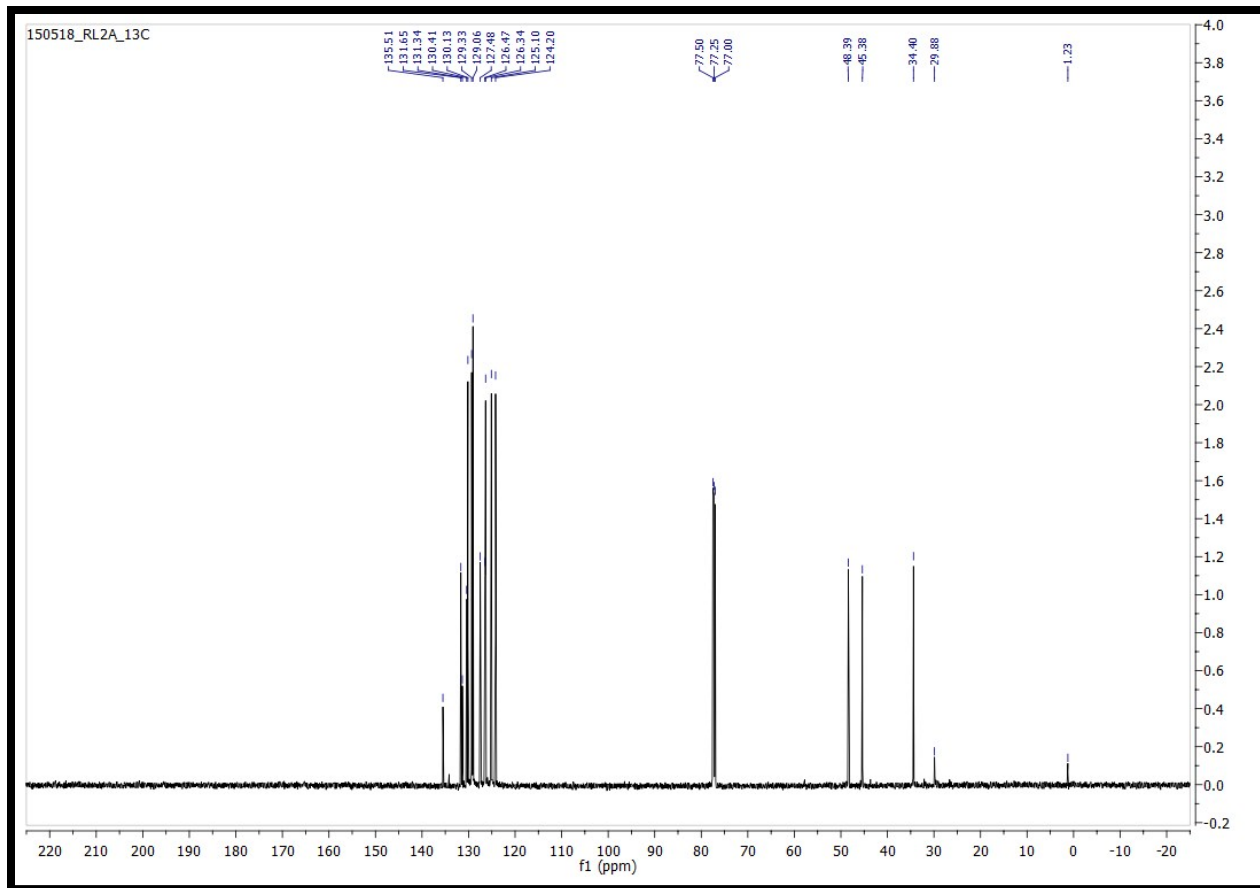

**Fig. S6.**  $^{13}\text{C}\{^1\text{H}\}$  NMR of ligand L1

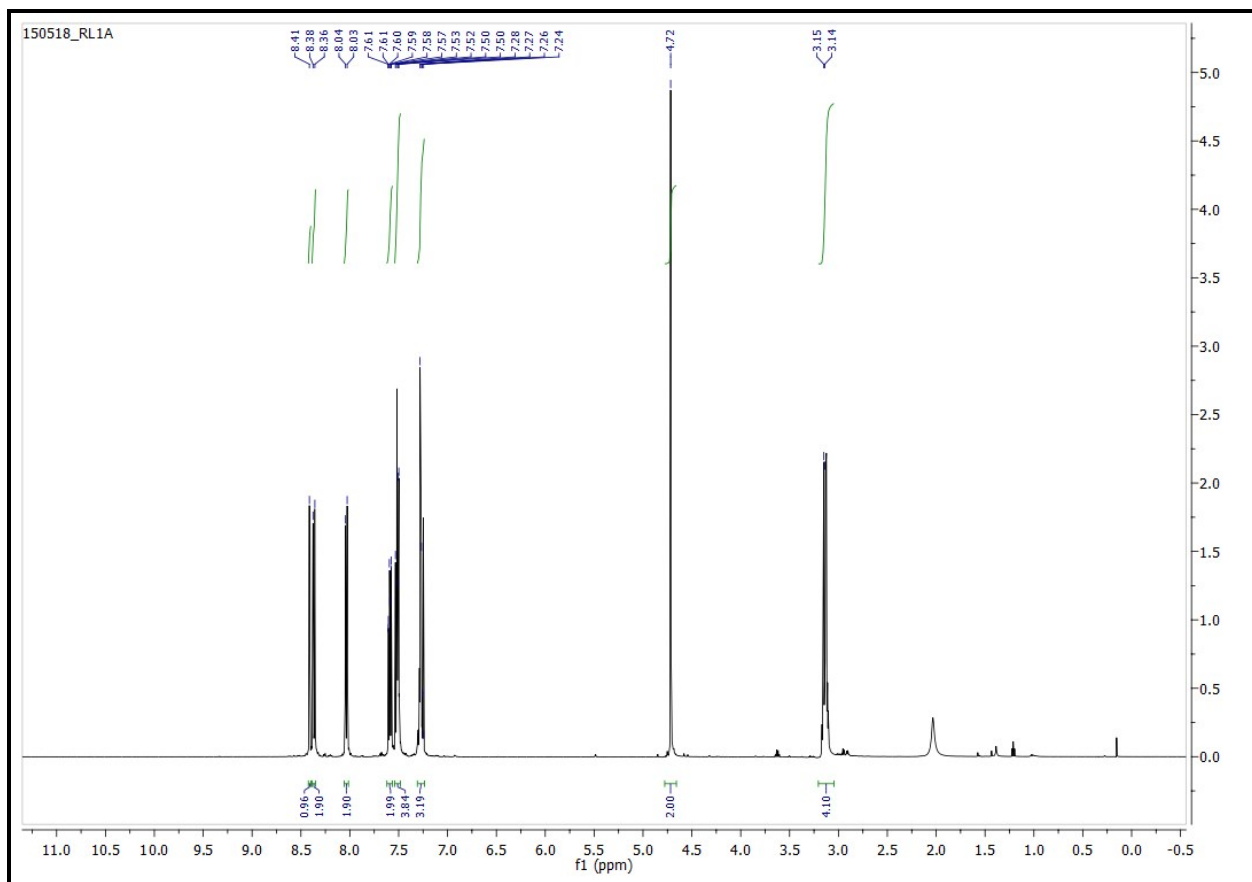

Fig. S7. <sup>1</sup>H NMR of ligand L2

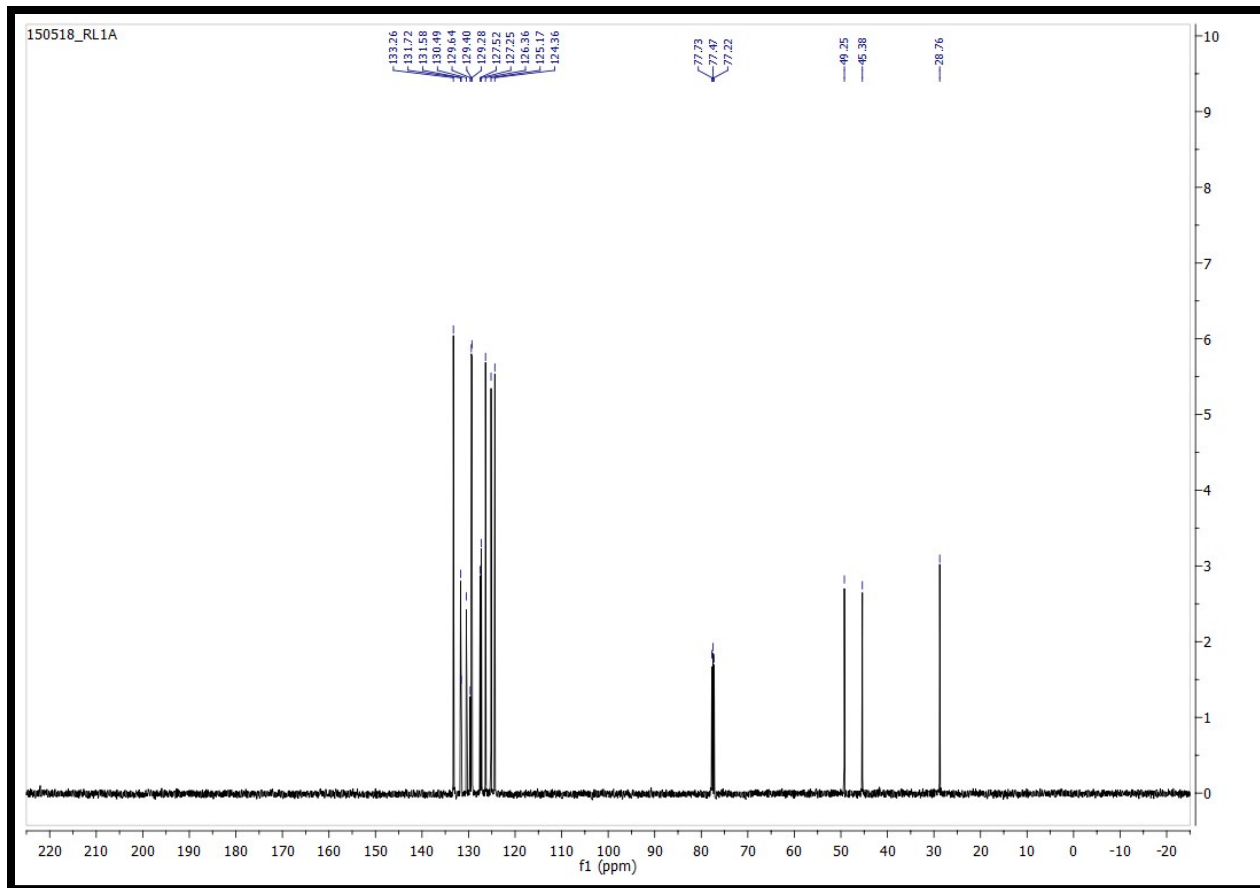

Fig. S8.  $^{13}\text{C}\{^1\text{H}\}$  NMR of ligand L2

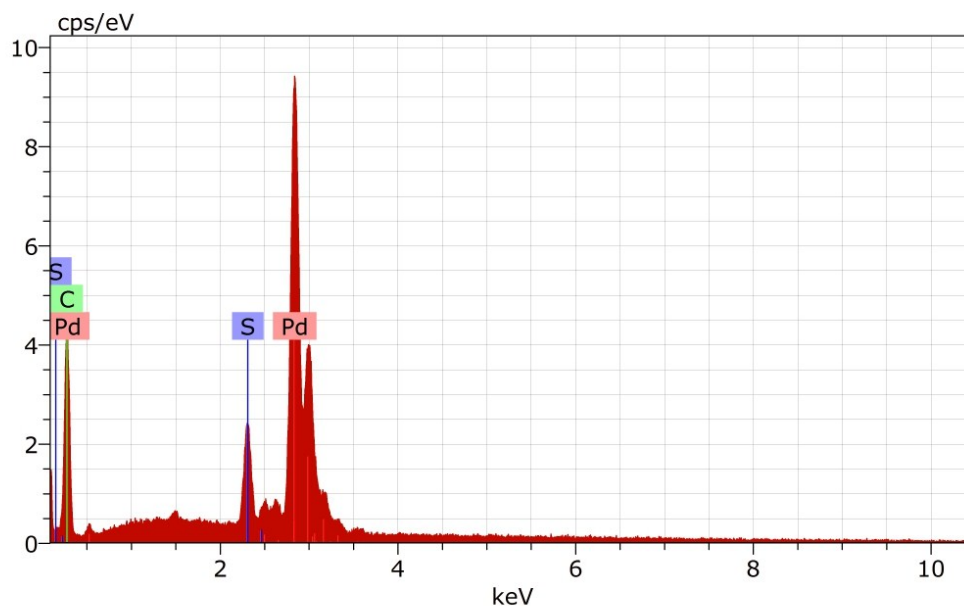

Spectrum: test 2700

| Element   | Series   | unn. C<br>[wt.%] | norm. C<br>[wt.%] | Atom. C<br>[at.%] | Error (3 Sigma)<br>[wt.%] |
|-----------|----------|------------------|-------------------|-------------------|---------------------------|
| Palladium | L-series | 62.10            | 78.70             | 33.02             | 6.04                      |
| Carbon    | K-series | 12.67            | 16.05             | 59.67             | 5.11                      |
| Sulfur    | K-series | 4.14             | 5.25              | 7.30              | 0.54                      |
| Total:    |          | 78.91            | 100.00            | 100.00            |                           |

**Fig. S9.** SEM-EDX analysis of NP's 1

## EDAX TEAM

### Full Area 1

20 Mag: 4000 Takeoff: 9 Live Time(s):

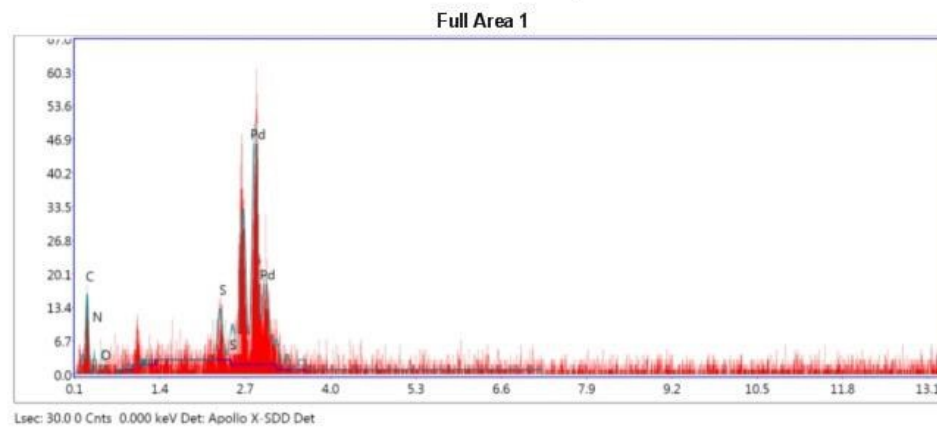

### eZAF Smart Quant Results

| Element | Weight % | Atomic % | Error % |
|---------|----------|----------|---------|
| C K     | 0.21     | 0.54     | 99.99   |
| N K     | 19.41    | 42.52    | 48.70   |
| O K     | 18.57    | 35.60    | 43.44   |
| S K     | 5.26     | 5.03     | 27.33   |
| PdL     | 56.55    | 16.31    | 9.82    |

**Fig. S10.** SEM-EDX analysis of NP's 2

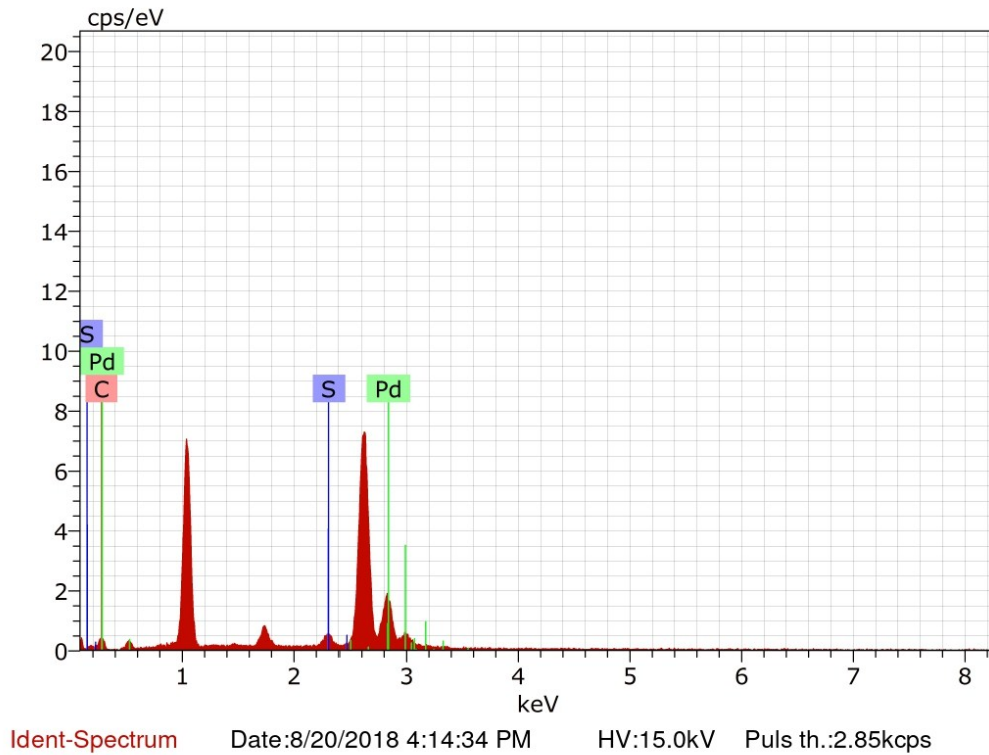

Spectrum: test 2729

| Element   | Series   | unn. C<br>[wt.%] | norm. C<br>[wt.%] | Atom. C<br>[at.%] | Error (3 Sigma)<br>[wt.%] |
|-----------|----------|------------------|-------------------|-------------------|---------------------------|
| Carbon    | K-series | 1.25             | 3.05              | 19.18             | 1.36                      |
| Palladium | L-series | 36.75            | 89.72             | 63.77             | 3.79                      |
| Sulfur    | K-series | 2.96             | 7.23              | 17.05             | 0.48                      |
| Total:    |          | 40.96            | 100.00            | 100.00            |                           |

**Fig. S11.** SEM-EDX analysis of NP's 3

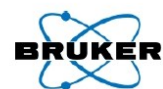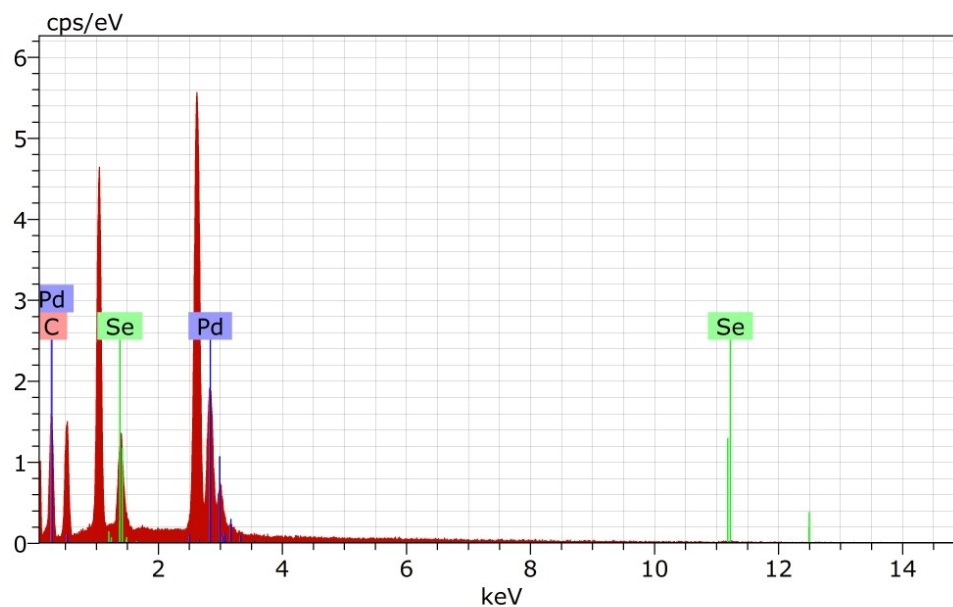

Spectrum: test 2704

| Element   | Series   | unn. C [wt.%] | norm. C [wt.%] | Atom. C [at.%] | Error (3 Sigma) [wt.%] |
|-----------|----------|---------------|----------------|----------------|------------------------|
| Carbon    | K-series | 5.80          | 10.99          | 50.13          | 3.23                   |
| Selenium  | L-series | 11.92         | 22.58          | 15.67          | 1.91                   |
| Palladium | L-series | 35.06         | 66.43          | 34.20          | 3.50                   |
| Total:    |          | 52.77         | 100.00         | 100.00         |                        |

**Fig. S12.** SEM-EDX analysis of NP's 4

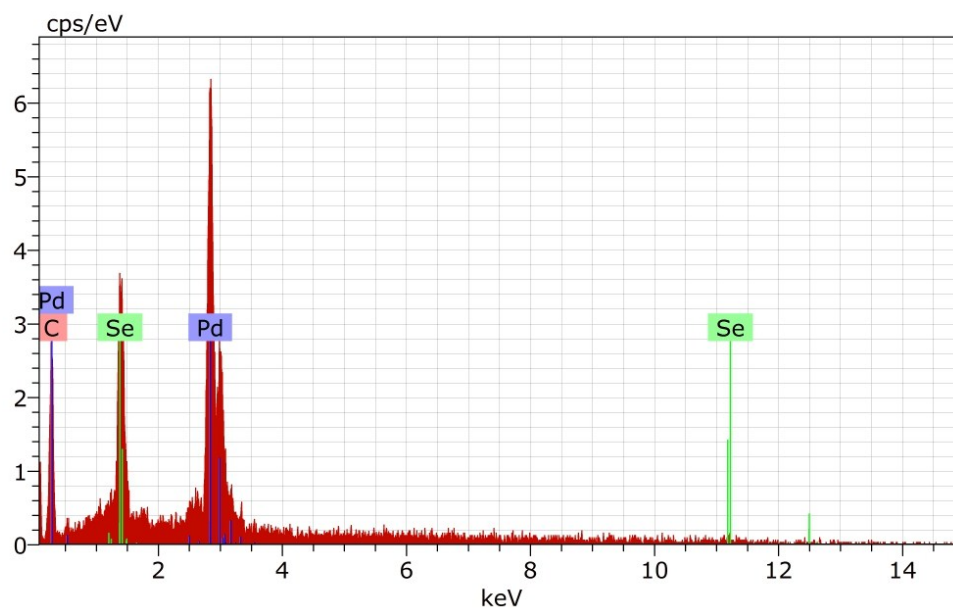

Spectrum: test 2705

| Element   | Series   | unn. C<br>[wt.%] | norm. C<br>[wt.%] | Atom. C<br>[at.%] | Error (3 Sigma)<br>[wt.%] |
|-----------|----------|------------------|-------------------|-------------------|---------------------------|
| Carbon    | K-series | 12.89            | 16.40             | 61.64             | 9.15                      |
| Selenium  | L-series | 15.43            | 19.62             | 11.22             | 2.77                      |
| Palladium | L-series | 50.30            | 63.98             | 27.14             | 5.41                      |
| Total:    |          | 78.62            | 100.00            | 100.00            |                           |

**Fig. S13.** SEM-EDX analysis of NP's 6



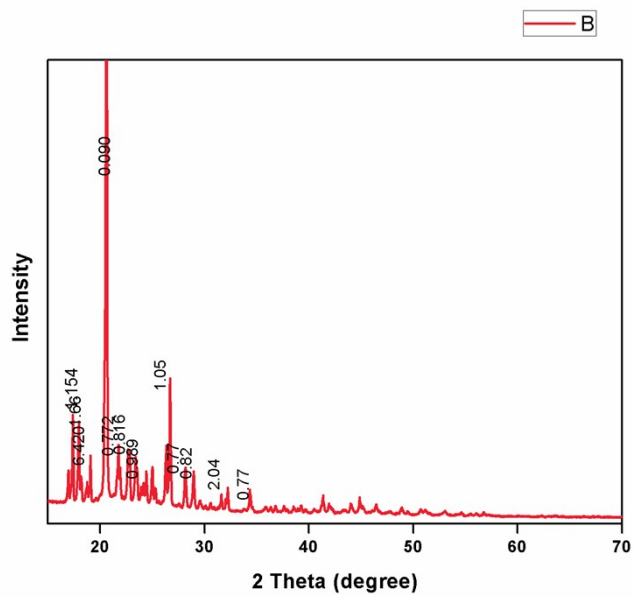

**Fig. S14.** PXRD analysis of ligand L1

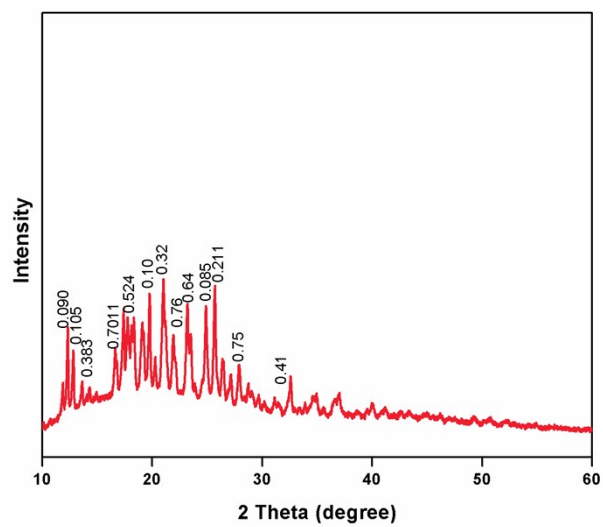

**Fig. S15.** PXRD analysis of ligand L2

## S2. NMR Data of Coupled Products of Suzuki reaction

**4-Nitrobiphenyl.**<sup>1</sup> Pale yellow solid. <sup>1</sup>H NMR (500 MHz, CdCl<sub>3</sub>): δ 7.406-7.515 (m, 3H), 7.609 (d, 2H), 7.709 (d, 2H), 8.266 (d, 2H).

**4-Phenylbenzotrile.**<sup>1</sup> Pale yellow solid. <sup>1</sup>H NMR (500 MHz, CdCl<sub>3</sub>): δ 7.339-7.447 (m, 3H, aromatic), 7.490-7.521(m, 3H, aromatic), 7.539-7.608(m, 3H, aromatic).

**Biphenyl-4-carboxaldehyde.**<sup>2</sup> Light yellow solid. <sup>1</sup>H NMR (500 MHz, CdCl<sub>3</sub>): δ 7.391-7.508 (m, 3H), 7.628-7.655 (m, 3H), 7.755 (d, 2H), 7.955 (d, 2H), 10.058 (s, 1H).

**Biphenyl-4-carboxylic acid.**<sup>3</sup> White solid. <sup>1</sup>H NMR (500 MHz, CdCl<sub>3</sub>): δ 7.393-7.523 (m, 3H), 7.727 (d, 2H), 7.793 (d, 2H), 8.026 (d, 2H).

**4-Methylbiphenyl.**<sup>1</sup> Colorless solid. <sup>1</sup>H NMR (300 MHz, CDCl<sub>3</sub>): δ 2.375 (s, 3H), 7.228 (d, 2H), 7.274-7.323 (m, 1H), 7.378-7.427 (m, 2H), 7.479 (d, 2H), 7.552-7.580(m, 2H).

**4-Phenylaniline.**<sup>1</sup> Brown solid. <sup>1</sup>H NMR (500 MHz, CDCl<sub>3</sub>): δ 3.722 (s, 2H), 6.752 (d, 2H), 7.246-7.286 (m, 1H), 7.364-7.428 (m, 4H), 7.533 (d, 2H).

**4-Hydroxybiphenyl.**<sup>3</sup> Brown solid. <sup>1</sup>H NMR (500 MHz, CDCl<sub>3</sub>): δ 4.915 (s, 1H, OH), 6.998 (d, 2H), 7.300-7.548 (m, 7H).

## S3. References

1. R. K. Arvela and N. E. Leadbeater, *Org. Lett.*, 2005, **7**, 2101.
2. B. Tao and D. W. J. Boykin, *Org. Chem.*, 2004, **69**, 4330.
3. G. M. Scheuermann, L. Rumi, P. Steurer, W. Bannwarth, R. Mulhaupt, *J. Am. Chem. Soc.*, 2009, **131**, 8262.
